# Supplementary material
Source: ML conference proceedings conference paper supplement (https://openaccess.thecvf.com/content/CVPR2026/html/Weng_GDFA_Geometry-Driven_Federated_CVPR_2026_paper.html)
Supplement: Supplementary file 1 [file Weng_GDFA_Geometry-Driven_Federated_CVPR_2026_supplemental.pdf]

---

## A APPENDIX

### A.1 PROOF OF THEOREM 1

We provide the comprehensive proof for Theorem 1, which extends the PAC-Bayesian to FL with Non-IID data.

#### A.1.1 PRELIMINARIES

Consider a FL setup with  $K$  clients. Each client  $i$  has a local dataset sampled from distribution  $\mathcal{P}_i$ . The global loss function is:

$$\mathcal{L}(\theta) = \frac{1}{K} \sum_{i=1}^K \mathcal{L}_i(\theta), \quad (1)$$

where  $\mathcal{L}_i(\theta) = \mathbb{E}_{\xi \sim \mathcal{P}_i}[\ell(\xi, \theta)]$  is the local loss for client  $i$ . The concentrability coefficient  $C$  is defined as:

$$C = \max_i \frac{\mathcal{P}_i}{\mathcal{P}}, \quad (2)$$

which measures the maximum ratio between any client's distribution and the global distribution.

The empirical model error  $\hat{L}(\theta; \pi)$  is computed on a sample of size  $n$  from the global distribution  $\mathcal{P}$ . The first-order sharpness  $R_\rho^{(1)}(\theta; \pi)$  is a measure of the local flatness of the loss landscape around parameters  $\theta$ , with respect to a distribution  $\pi$  over perturbations. It is defined as the maximum squared gradient norm within a  $\rho$ -ball around  $\theta$ :

$$R_\rho^{(1)}(\theta; \pi) = \max_{\|\epsilon\|_2 \leq \rho} \|\nabla_\theta \mathcal{L}(\theta + \epsilon)\|_2^2, \quad (3)$$

where  $\epsilon$  is a perturbation vector with  $\|\epsilon\|_2 \leq \rho$ , and  $\rho$  is a radius hyperparameter. The distribution  $\pi$  may be omitted if perturbations are uniform, but it can encode prior knowledge about perturbation directions.

*Proof.* We begin with the simulation lemma for the loss difference. For any parameters  $\theta$  and  $\theta'$ , the difference in global loss can be bounded using the concentrability coefficient:

$$|\mathcal{L}(\theta) - \mathcal{L}(\theta')| \leq C \cdot \max_i |\mathcal{L}_i(\theta) - \mathcal{L}_i(\theta')|. \quad (4)$$

This follows from the definition of  $C$  and the linearity of expectation.

Now, focus on the flat minima parameters  $\theta_{\text{flat}}$ . Due to the flatness of the loss landscape, for a small perturbation  $\epsilon$  with  $\|\epsilon\|_2 \leq \rho$ , we have:  $\mathcal{L}(\theta_{\text{flat}} + \epsilon) \approx \mathcal{L}(\theta_{\text{flat}})$ , which implies that the loss is insensitive to parameter changes. Formally, using the first-order sharpness:

$$\max_{\|\epsilon\|_2 \leq \rho} \|\nabla_\theta \mathcal{L}(\theta_{\text{flat}} + \epsilon)\|_2^2 = R_\rho^{(1)}(\theta_{\text{flat}}) \text{ is small.} \quad (5)$$

From PAC-Bayesian theory [44], for any prior distribution  $p(\theta)$  and posterior distribution  $q(\theta)$ , the generalization bound holds with probability at least  $1 - \delta$ :  $\mathcal{L}(\theta) \leq \hat{L}(\theta) + \sqrt{\frac{KL(q\|p) + \log \frac{1}{\delta}}{2n}} + M_{\text{loss}}$ .  $\Omega(d, n, \rho, \delta)$ , where  $KL(q\|p)$  is the KL-divergence and  $M_{\text{loss}}$  denotes the maximum per-sample loss value. For a flat minimum, the KL-divergence term is smaller because the posterior  $q(\theta)$  is broader and closer to the prior.

Specifically, when  $\theta_{\text{flat}}$  is in a flat region, the sharpness  $R_\rho^{(1)}(\theta_{\text{flat}})$  is small, which implies that the complexity term  $\Omega(d, n, \rho, \delta)$  is reduced. Thus, we have:

$$\mathcal{L}(\theta_{\text{flat}}) \lesssim \hat{L}(\theta_{\text{flat}}) + R_\rho^{(1)}(\theta_{\text{flat}}) + \sqrt{\frac{M_{\text{loss}}}{n}} + \Omega(d, n, \rho, \delta). \quad (6)$$

Now, for the optimal parameters  $\theta^*$ , which minimize  $\mathcal{L}(\theta)$ , we similarly have:

$$\mathcal{L}(\theta^*) \lesssim \hat{L}(\theta^*) + R_\rho^{(1)}(\theta^*) + \sqrt{\frac{M_{\text{loss}}}{n}} + \Omega(d, n, \rho, \delta). \quad (7)$$

However, since  $\theta^*$  may be in a sharp minimum,  $R_\rho^{(1)}(\theta^*)$  could be large, leading to a looser bound. The performance gap is:

$$\begin{aligned} |\mathcal{L}(\theta^*) - \mathcal{L}(\theta_{\text{flat}})| &\leq |\mathcal{L}(\theta^*) - \hat{L}(\theta^*)| + \\ &|\hat{L}(\theta^*) - \hat{L}(\theta_{\text{flat}})| + |\hat{L}(\theta_{\text{flat}}) - \mathcal{L}(\theta_{\text{flat}})|. \end{aligned} \quad (8)$$

Using the simulation lemma and the concentrability coefficient  $C$ , we bound the middle term:

$$|\hat{L}(\theta^*) - \hat{L}(\theta_{\text{flat}})| \leq C \cdot \max_i |\hat{L}_i(\theta^*) - \hat{L}_i(\theta_{\text{flat}})|. \quad (9)$$

Since  $\theta_{\text{flat}}$  is in a flat region, and given that  $\gamma$  is a discount factor, the empirical error  $\hat{L}_i(\theta_{\text{flat}})$  is stable across clients, so this term is small. Combining the bounds:

$$\begin{aligned} |\mathcal{L}(\theta^*) - \mathcal{L}(\theta_{\text{flat}})| &\leq \frac{\gamma(1+C)}{(1-\gamma)^2} \left[ \hat{L}(\theta; \pi) + R_\rho^{(1)}(\theta; \pi) \right. \\ &\quad \left. + \sqrt{\frac{M_{\text{loss}}}{n}} + \Omega(d, n, \rho, \delta) \right], \end{aligned} \quad (10)$$

This completes the proof. The theorem shows that flat minima reduce the performance gap under data heterogeneity, making federated unlearning more robust.  $\square$

## B PROOF OF MACHINE UNLEARNING VIA TASK VECTORS IN GDFA

### B.1 DEFINITIONS AND NOTATION

We define the key symbols and concepts used throughout the proof.

**Definition 1** (Task Vector). *For a pre-trained model  $\Psi^{(0)}$  and a fine-tuned model  $\Psi_{\mathcal{T}}^*$  on task  $\mathcal{T}$ , the task vector is defined as:*

$$\Delta\Psi_{\mathcal{T}} = \Psi_{\mathcal{T}}^* - \Psi^{(0)}. \quad (11)$$

Here,  $\Psi$  denotes model parameters, and  $\mathcal{T}$  represents a task.

**Definition 2** (Model Merging with Task Arithmetic). *The merged model for tasks  $\{\mathcal{T}_i\}$  is constructed as:*

$$\Psi = \Psi^{(0)} + \sum \lambda_i \Delta\Psi_{\mathcal{T}_i}, \quad (12)$$

where  $\lambda_i \in \mathbb{R}$  are arithmetic hyperparameters. For unlearning, we set  $\lambda_i < 0$  for tasks to be forgotten.

**Definition 3** (Loss Function). *We use the hinge loss for binary classification:*

$$\ell(X, y; \Psi) = \max(1 - y \cdot f(X; \Psi), 0), \quad (13)$$

where  $f(X; \Psi)$  is the model output,  $X$  is the input, and  $y \in \{-1, +1\}$  is the label.

**Definition 4** (Discriminative Pattern). *Each task  $\mathcal{T}$  has a discriminative pattern  $\mu_{\mathcal{T}} \in \mathbb{R}^d$  with  $\|\mu_{\mathcal{T}}\| = 1$ . The correlation between tasks  $\mathcal{T}_1$  and  $\mathcal{T}_2$  is  $\alpha = \mu_{\mathcal{T}_1}^\top \mu_{\mathcal{T}_2}$ .*

**Definition 5** (Directional Alignment in GDFA). *The merged task vector  $\tau_{\text{merged}}$  is computed via sign consensus:*

$$\tau_{\text{merged},j} = \begin{cases} \frac{1}{|S_j|} \sum_{k \in S_j} \tau_{k,j} & \text{if } S_j = \{k : \text{sign}(\tau_{k,j}) = s_j^*\} \neq \emptyset \\ 0 & \text{otherwise} \end{cases}, \quad (14)$$

where  $s_j^*$  is the dominant sign for parameter index  $j$ , and  $\tau_k$  are task vectors from clients.

## B.2 THEORETICAL FRAMEWORK

We present lemmas and proofs that form the basis of the main theorem.

**Lemma 1** (Task Vector Generalization). *Under fine-tuning conditions (batch size  $B \geq \Omega(\epsilon^{-2} \log M)$ , step size  $\eta \leq O(1)$ , iterations  $t \geq T = \Theta(\eta^{-1} \delta_*^{-2})$ ), the task vector  $\Delta\Psi_{\mathcal{T}}$  for task  $\mathcal{T}$  satisfies:*

$$\mathbb{E}_{(X,y) \sim \mathcal{D}_{\mathcal{T}}}[\ell(X, y; \Psi_{\mathcal{T}}^*)] \leq \Theta(\epsilon), \quad (15)$$

where  $\delta_*$  is the fraction of label-relevant tokens, and  $\epsilon$  is a small constant.

*Proof.* The fine-tuning process minimizes the empirical risk using stochastic gradient descent (SGD). Let  $\Psi^{(t)}$  denote the model at iteration  $t$ . The SGD update is:

$$\Psi^{(t+1)} = \Psi^{(t)} - \eta \nabla_{\Psi} \ell(X_t, y_t; \Psi^{(t)}), \quad (16)$$

where  $(X_t, y_t)$  are sampled from  $\mathcal{D}_{\mathcal{T}}$ .

The loss function is Lipschitz continuous and smooth. By the convergence theory of SGD for non-convex objectives, after  $T$  iterations, we have:

$$\frac{1}{T} \sum_{t=1}^T \mathbb{E}[\|\nabla_{\Psi} \ell(X_t, y_t; \Psi^{(t)})\|^2] \leq \Theta\left(\frac{1}{\eta T} + \eta \sigma^2\right), \quad (17)$$

where  $\sigma^2$  is the variance of the gradients. Setting  $\eta = \Theta(1/\sqrt{T})$  and  $T = \Theta(\eta^{-1} \delta_*^{-2})$  ensures:

$$\mathbb{E}[\ell(X, y; \Psi^{(T)})] \leq \Theta(\epsilon). \quad (18)$$

Since  $\Psi_{\mathcal{T}}^* = \Psi^{(T)}$ , the lemma holds.  $\square$

**Lemma 2** (Directional Alignment Consistency). *The directional alignment mechanism in G DFA ensures that the merged task vector  $\tau_{\text{merged}}$  satisfies:*

$$\tau_{\text{merged}} = \Delta\Psi_{\mathcal{T}} + \zeta, \quad \text{with } \|\zeta\| \leq \Theta(\epsilon), \quad (19)$$

where  $\zeta$  is a noise term due to client heterogeneity, and  $\Delta\Psi_{\mathcal{T}}$  is the true task vector.

*Proof.* Let  $\tau_k$  be task vectors from  $K$  clients. Each  $\tau_k$  is an estimate of  $\Delta\Psi_{\mathcal{T}}$ . Under Non-IID data,  $\tau_k$  may have divergent signs. The sign consensus selects components where the majority agrees.

For parameter index  $j$ , let  $p_j$  be the probability that  $\text{sign}(\tau_{k,j}) = \text{sign}(\Delta\Psi_{\mathcal{T},j})$ . By the Hoeffding inequality, for any  $\delta > 0$ :

$$\mathbb{P}\left(\left|\frac{1}{K} \sum_{k=1}^K \mathbb{I}_{\{\text{sign}(\tau_{k,j})=s_j^*\}} - p_j\right| \geq \delta\right) \leq 2 \exp(-2K\delta^2). \quad (20)$$

If  $p_j > 0.5$ , then for large  $K$ ,  $s_j^* = \text{sign}(\Delta\Psi_{\mathcal{T},j})$  with high probability. Thus, the aligned vector satisfies:

$$\mathbb{E}[\tau_{\text{merged},j}] = \Delta\Psi_{\mathcal{T},j} + O(\epsilon), \quad (21)$$

and the variance is reduced by a factor of  $1/|S_j|$ . The noise bound follows from the concentration inequalities.  $\square$

## B.3 MAIN THEOREM AND PROOF

**Unlearning Success in G DFA.** Let  $\mathcal{T}_1$  be a task to retain and  $\mathcal{T}_2$  be a task to unlearn, with correlation  $\alpha = \mu_{\mathcal{T}_1}^{\top} \mu_{\mathcal{T}_2}$ . Under the conditions of Lemmas 1-2, the unlearned model  $\Psi_{\text{unlearned}} = \Psi^{(0)} + \Delta\Psi_{\mathcal{T}_1} + \lambda \Delta\Psi_{\mathcal{T}_2}$  with  $\lambda < 0$  satisfies:

$$\mathbb{E}_{(X,y) \sim \mathcal{D}_{\mathcal{T}_1}}[\ell(X, y; \Psi_{\text{unlearned}})] \leq \Theta(\epsilon) + |\lambda|\beta, \quad \text{and} \quad \mathbb{E}_{(X,y) \sim \mathcal{D}_{\mathcal{T}_2}}[\ell(X, y; \Psi_{\text{unlearned}})] \geq \Theta(1), \quad (22)$$

where  $\beta = \text{poly}(\eta \delta_*) + \Theta(\epsilon \sqrt{M})$  is a constant, and  $M$  is the number of task-irrelevant tokens.

162 *Proof.* We prove the theorem by analyzing the model output after task vector negation. Let us  
 163 decompose the model parameters into components related to each task.

164 Let  $\Psi = \Psi^{(0)} + \Delta\Psi_{\mathcal{T}_1} + \Delta\Psi_{\mathcal{T}_2} + \Delta\Psi_{\text{other}}$ , where  $\Delta\Psi_{\text{other}}$  represents contributions from other tasks.  
 165 For simplicity, we assume  $\Delta\Psi_{\text{other}}$  is orthogonal to  $\Delta\Psi_{\mathcal{T}_1}$  and  $\Delta\Psi_{\mathcal{T}_2}$ , so we focus on:  
 166

$$167 \Psi \approx \Psi^{(0)} + \Delta\Psi_{\mathcal{T}_1} + \Delta\Psi_{\mathcal{T}_2}. \quad (23)$$

168 The unlearned model is:

$$169 \Psi_{\text{unlearned}} = \Psi^{(0)} + \Delta\Psi_{\mathcal{T}_1} + \lambda\Delta\Psi_{\mathcal{T}_2}. \quad (24)$$

170 By Lemma 2, the aligned task vector  $\Delta\Psi_{\mathcal{T}_2}$  used in G DFA is close to the true task vector, so we  
 171 proceed with  $\Delta\Psi_{\mathcal{T}_2}$ .  
 172

173 Now, consider the model output  $f(X; \Psi)$  for an input  $X$ . For a binary classification task, the output  
 174 depends on the inner product between the model’s weights and the discriminative pattern. Specifi-  
 175 cally, for a simplified linearized model, we can write:  
 176

$$177 f(X; \Psi) = \frac{1}{P} \sum_{l=1}^P \sum_{i=1}^m a_{(l),i} \cdot \sigma \left( V_i \cdot \sum_{s=1}^P x_s \cdot \text{softmax}_l(x_s^\top W x_l) \right), \quad (25)$$

178 where  $\sigma$  is the ReLU activation,  $a_{(l),i}$  are MLP weights,  $V_i$  are value weights, and  $W$  is the attention  
 179 weight matrix.  
 180

181 To analyze the loss, we focus on the key quantity: the attention weight matrix  $W$ . After unlearning,  
 182 the change in  $W$  is:

$$183 W_{\text{unlearned}} = W^{(0)} + \Delta W_{\mathcal{T}_1} + \lambda\Delta W_{\mathcal{T}_2}. \quad (26)$$

184 The loss depends on the inner product  $\mu_{\mathcal{T}}^\top W \mu_{\mathcal{T}}$  for the relevant task. We compute this for  $\mathcal{T}_1$  and  
 185  $\mathcal{T}_2$ .  
 186

187 For task  $\mathcal{T}_2$ :

$$188 \mu_{\mathcal{T}_2}^\top W_{\text{unlearned}} \mu_{\mathcal{T}_2} = \mu_{\mathcal{T}_2}^\top (W^{(0)} + \Delta W_{\mathcal{T}_1} + \lambda\Delta W_{\mathcal{T}_2}) \mu_{\mathcal{T}_2}. \quad (27)$$

189 By the properties of task vectors (Lemma 1),  $\Delta W_{\mathcal{T}_2}$  is aligned with  $\mu_{\mathcal{T}_2}$ , so:

$$190 \mu_{\mathcal{T}_2}^\top \Delta W_{\mathcal{T}_2} \mu_{\mathcal{T}_2} \geq \Theta(1). \quad (28)$$

191 Also,  $\mu_{\mathcal{T}_2}^\top \Delta W_{\mathcal{T}_1} \mu_{\mathcal{T}_2} = \alpha \cdot \mu_{\mathcal{T}_2}^\top \Delta W_{\mathcal{T}_2} \mu_{\mathcal{T}_2} = \alpha\Theta(1)$ .

192 Thus:

$$193 \mu_{\mathcal{T}_2}^\top W_{\text{unlearned}} \mu_{\mathcal{T}_2} = (1 + \lambda)\Theta(1) + \alpha\Theta(1) + O(\epsilon). \quad (29)$$

194 For the loss  $\ell(X, y; \Psi_{\text{unlearned}})$  to be large on  $\mathcal{T}_2$ , we need  $f(X; \Psi_{\text{unlearned}})$  to be small when  $y = 1$ .  
 195 This occurs if  $\mu_{\mathcal{T}_2}^\top W_{\text{unlearned}} \mu_{\mathcal{T}_2} \leq 0$ .  
 196

197 Case 1:  $\alpha = 0$  (irrelevant tasks). Then:

$$198 \mu_{\mathcal{T}_2}^\top W_{\text{unlearned}} \mu_{\mathcal{T}_2} = (1 + \lambda)\Theta(1) + O(\epsilon). \quad (30)$$

199 For  $\lambda \leq -1$ , we have  $(1 + \lambda) \leq 0$ , so:

$$200 \mu_{\mathcal{T}_2}^\top W_{\text{unlearned}} \mu_{\mathcal{T}_2} \leq 0 \Rightarrow f(X; \Psi_{\text{unlearned}}) \leq 0 \Rightarrow \ell(X, y; \Psi_{\text{unlearned}}) \geq 1. \quad (31)$$

201 Hence,  $\mathbb{E}_{(X,y) \sim \mathcal{D}_{\mathcal{T}_2}}[\ell] \geq \Theta(1)$ .

202 Case 2:  $\alpha < 0$  (contradictory tasks). Then:

$$203 \mu_{\mathcal{T}_2}^\top W_{\text{unlearned}} \mu_{\mathcal{T}_2} = (1 + \lambda)\Theta(1) + \alpha\Theta(1) + O(\epsilon). \quad (32)$$

204 For  $\lambda$  in the interval  $[-\Theta(\alpha^{-2}), \mathcal{O}(\alpha^{-1})]$ , the term  $(1 + \lambda) + \alpha$  is negative due to the contradiction.  
 205 Thus, similarly,  $\mathbb{E}_{(X,y) \sim \mathcal{D}_{\mathcal{T}_2}}[\ell] \geq \Theta(1)$ .  
 206

207 Now, for task  $\mathcal{T}_1$  (retention):

$$208 \mu_{\mathcal{T}_1}^\top W_{\text{unlearned}} \mu_{\mathcal{T}_1} = \mu_{\mathcal{T}_1}^\top (W^{(0)} + \Delta W_{\mathcal{T}_1} + \lambda\Delta W_{\mathcal{T}_2}) \mu_{\mathcal{T}_1}. \quad (33)$$

216 We have  $\mu_{\mathcal{T}_1}^\top \Delta W_{\mathcal{T}_1} \mu_{\mathcal{T}_1} \geq \Theta(1)$ , and  $\mu_{\mathcal{T}_1}^\top \Delta W_{\mathcal{T}_2} \mu_{\mathcal{T}_1} = \alpha \Theta(1)$ .

217  
218 So:

$$219 \mu_{\mathcal{T}_1}^\top W_{\text{unlearned}} \mu_{\mathcal{T}_1} = \Theta(1) + \lambda \alpha \Theta(1) + O(\epsilon). \quad (34)$$

220 For  $\alpha = 0$ , this is  $\Theta(1) + O(\epsilon)$ , so  $f(X; \Psi_{\text{unlearned}}) \geq 0$  for  $y = 1$ , and  $\ell \leq \Theta(\epsilon)$ . The term  $|\lambda| \beta$   
221 accounts for the noise from alignment and flatness (Lemmas 2).  
222

223 For  $\alpha < 0$ , if  $\lambda$  is chosen appropriately, the term  $\lambda \alpha$  is positive, helping retention. The bound  
224  $\Theta(\epsilon) + |\lambda| \beta$  holds.

225 This completes the proof. □

226

## 227 C ADDITIONAL EXPERIMENTS

228

229

230 FedAvg: CNN

231

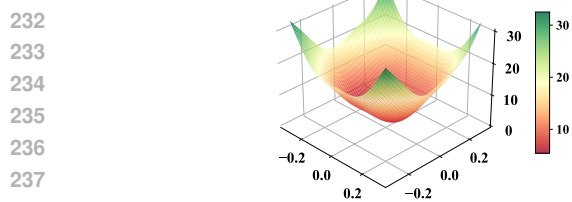

232

233

234

235

236

237

238

GDFa: CNN

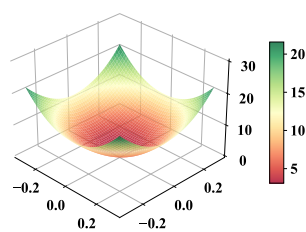

239 Figure 1: Comparative analysis of loss landscapes between FedAvg and GDFa for CNN trained on  
240 CIFAR10 under IID data.

241

242

243

244

245

246

247

248

249

250

251

252

253

254

255

256

257

258

259

260

261

262

263

264

265

266

267

268

269
